# Supplementary material for: Tetraphenylethylene-based microporous organic polymers: insight into structure geometry, porosity, and CO2/CH4 selectivity
Source: Royal Society of Chemistry journal article supplement (doi:10.1039/c6ra09061c), 2016-01-01
Supplement: c6ra09061c1.pdf [file c6ra09061c1.pdf]

Electronic Supplementary Information (ESI) for

**Tetraphenylethylene-based microporous organic  
polymers: insight into structure geometry,  
porosity, and CO<sub>2</sub>/CH<sub>4</sub> selectivity**

Hui Li,<sup>†,‡</sup> Xuesong Ding,<sup>\*,†</sup> and Bao-Hang Han<sup>\*,†</sup>

*<sup>†</sup> CAS Key Laboratory of Nanosystem and Hierarchical Fabrication, CAS  
Center for Excellence in Nanoscience, National Center for Nanoscience  
and Technology, Beijing 100190, China;*

*<sup>‡</sup> University of Chinese Academy of Sciences, Beijing 100049, China*

Tel: +86 10 8254 5576; Email: [hanbh@nanoctr.cn](mailto:hanbh@nanoctr.cn)

Tel: +86 10 8254 5708; Email: [dingxs@nanoctr.cn](mailto:dingxs@nanoctr.cn)

## **Contents**

**Section A. Figure of ketal-linked structure**

**Section B. TGA curves**

**Section C. FE-SEM images**

**Section D. HR-TEM images**

**Section E. FT-IR spectral profiles**

**Section F. Solid-state  $^{13}\text{C}$  CP/MAS NMR**

**Section G. Corresponding data of porosity properties**

**Section H. Corresponding data of isosteric heats of adsorption**

**Section I. Corresponding data of gas selectivity analyses**

## Section A. Figure of ketal-linked structure

a)

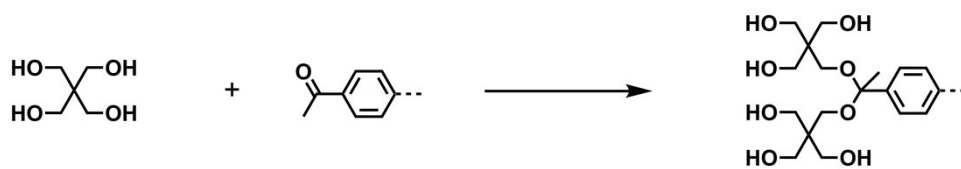

b)

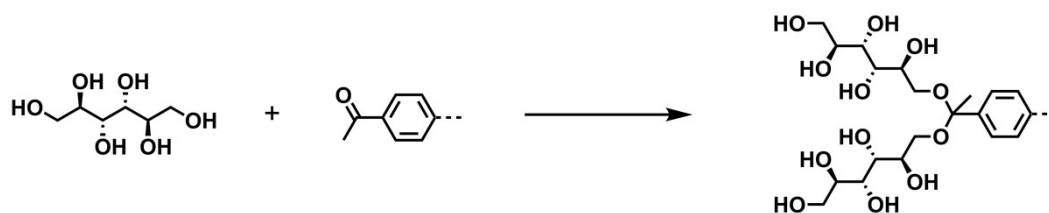

**Fig. S1** Branched ketal-linked structures in (a) **PTPOPs** and (b) **MTPOPs**.

## Section B. TGA curves

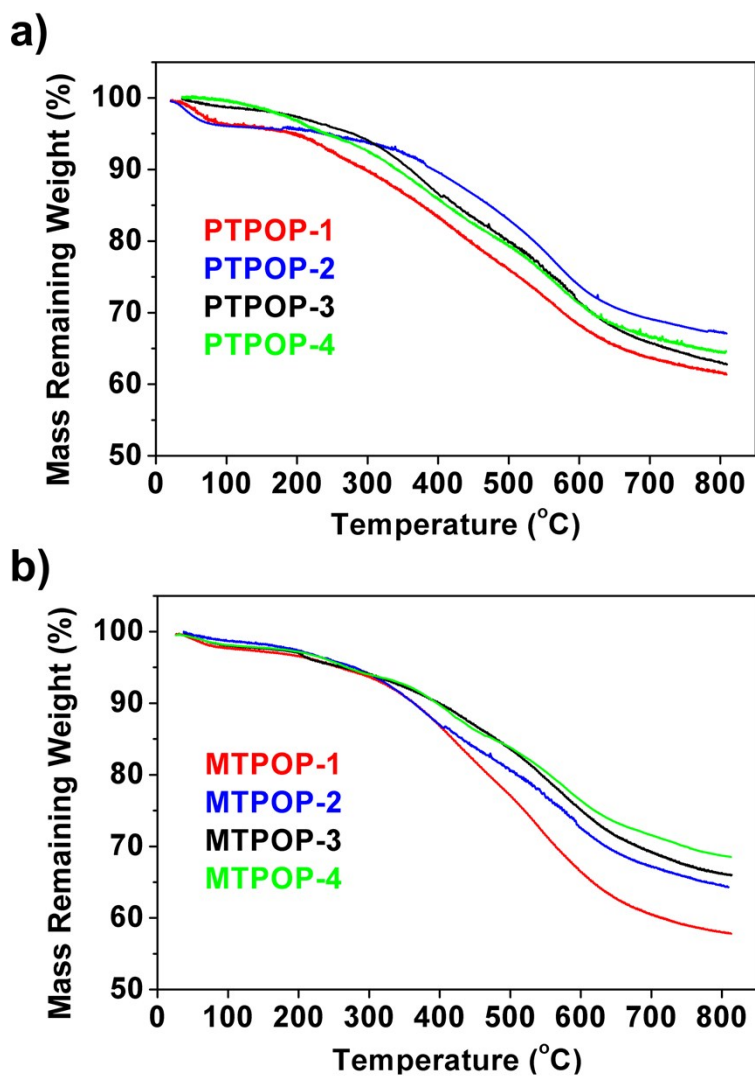

Fig. S2 TGA curves of PTPOP-1–4 and MTPOP-1–4.

### Section C. FE-SEM images

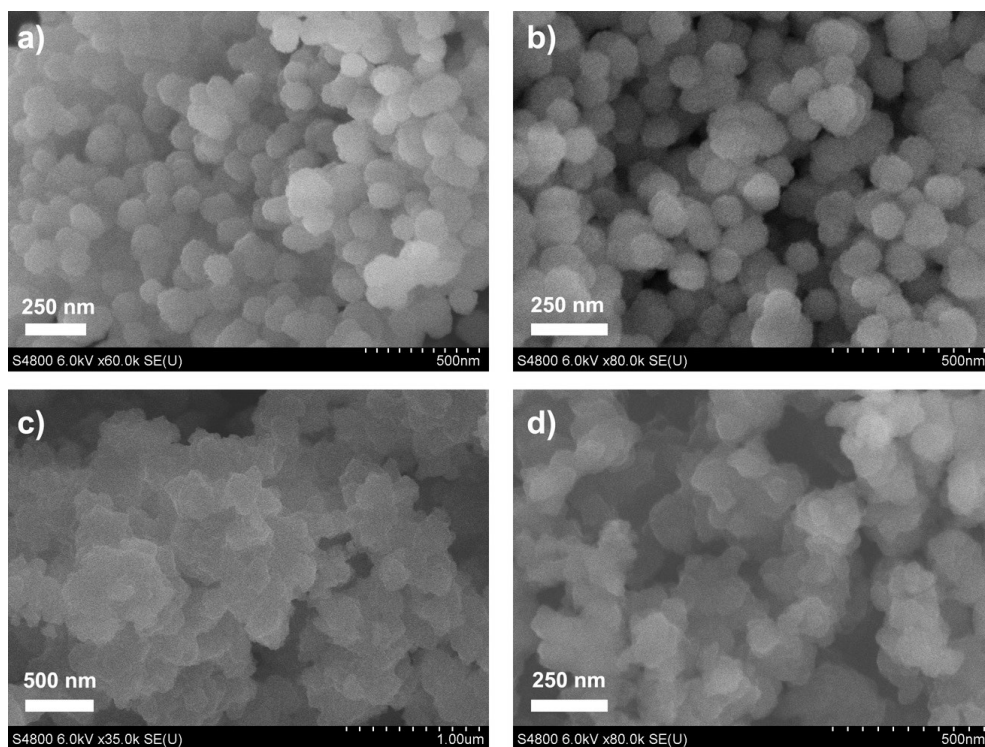

**Fig. S3** FE-SEM images of PTPOP-1 (a), PTPOP-2 (b), PTPOP-3 (c), and PTPOP-4 (d).

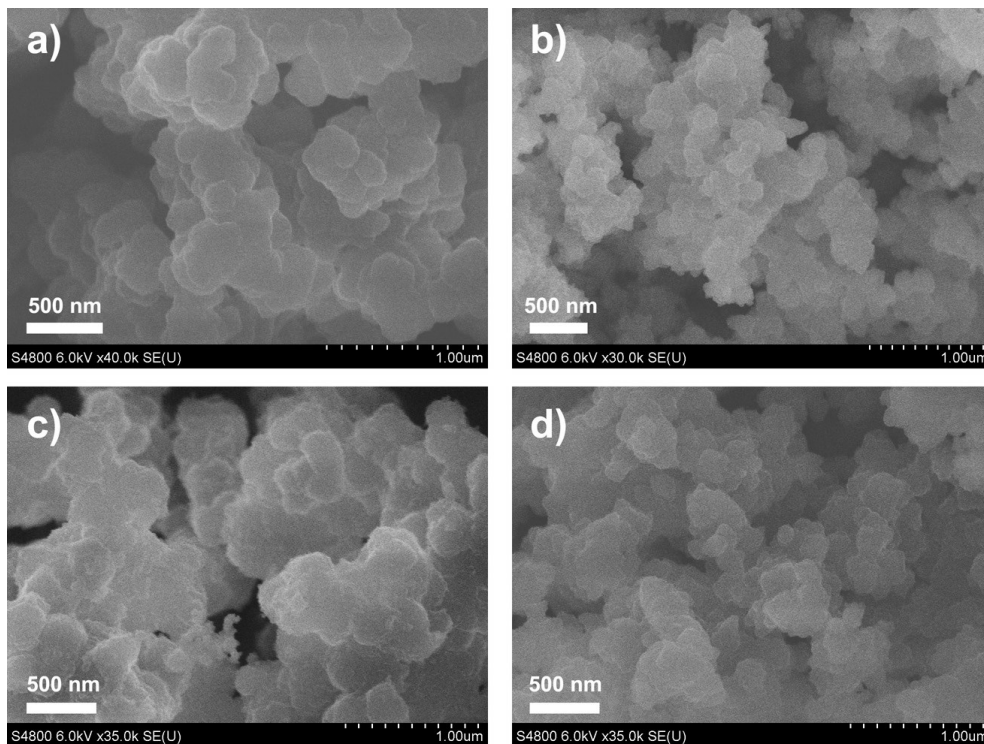

**Fig. S4** FE-SEM images of **MTPOP-1** (a), **MTPOP-2** (b), **MTPOP-3** (c), and **MTPOP-4** (d).

**Section D. HR-TEM images**

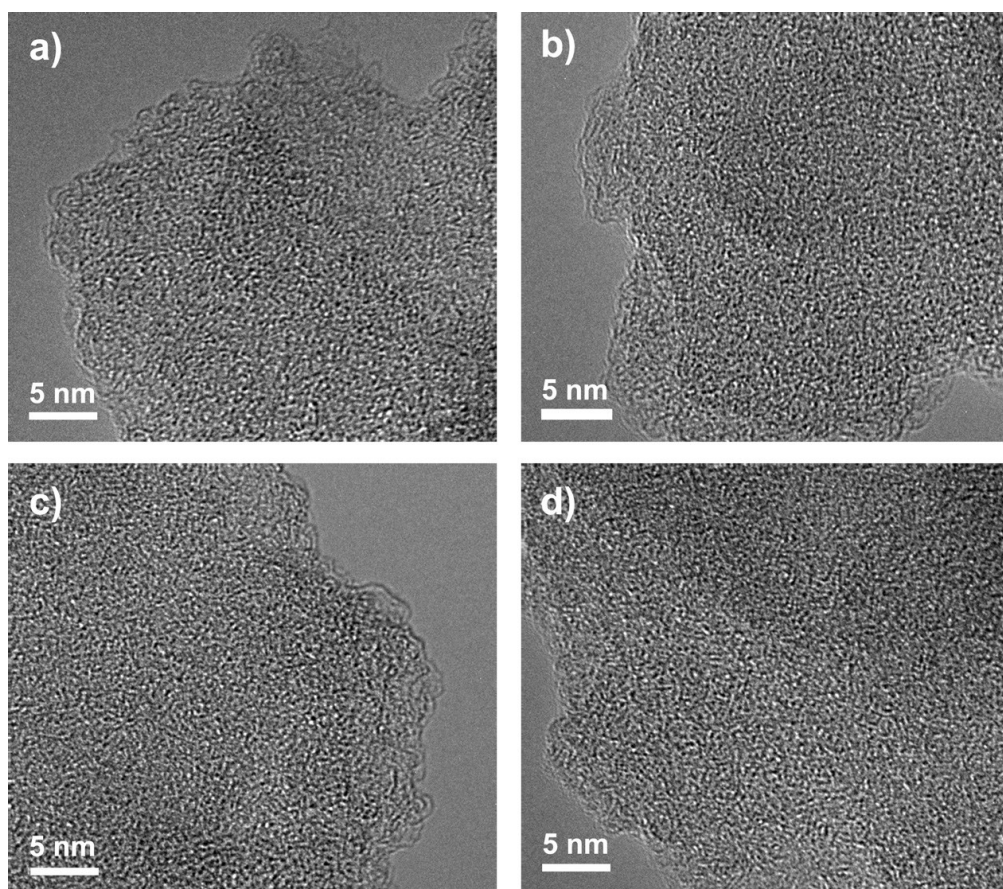

**Fig. S5** HR-TEM images of **PTPOP-1** (a), **PTPOP-2** (b), **PTPOP-3** (c), and **PTPOP-4** (d).

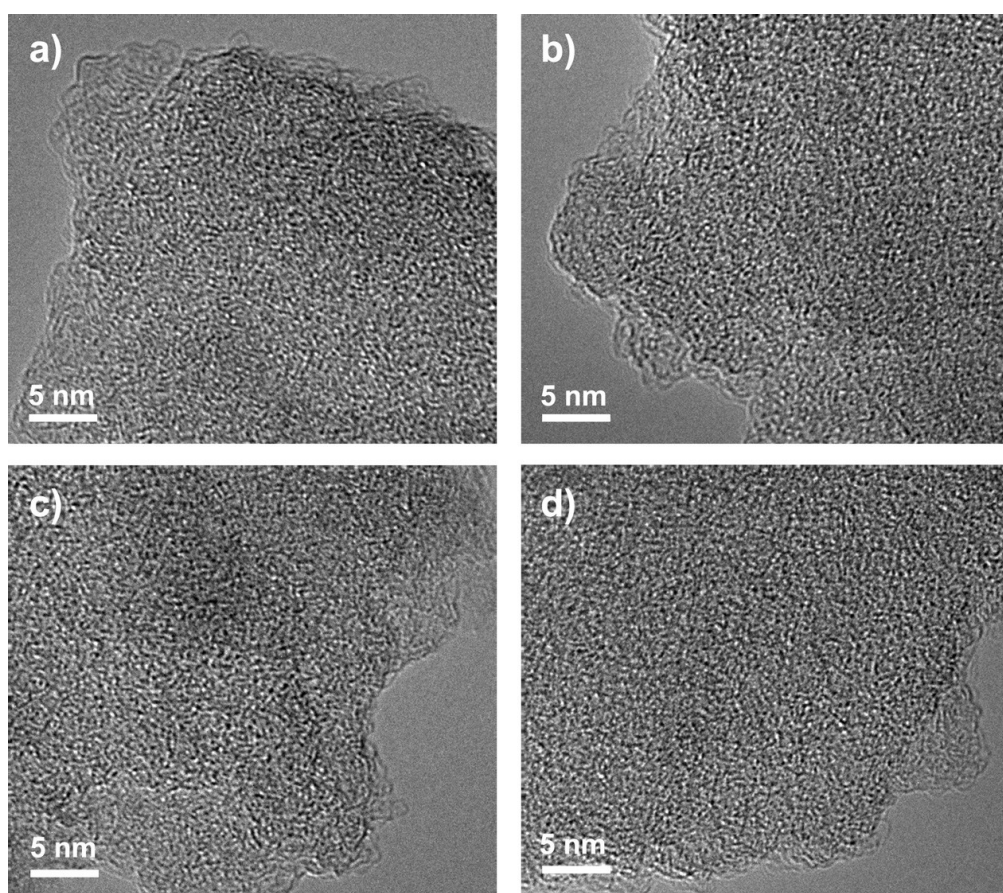

**Fig. S6** HR-TEM images of **MTPOP-1** (a), **MTPOP-2** (b), **MTPOP-3** (c), and **MTPOP-4** (d).



## Section E. FT-IR spectral profiles

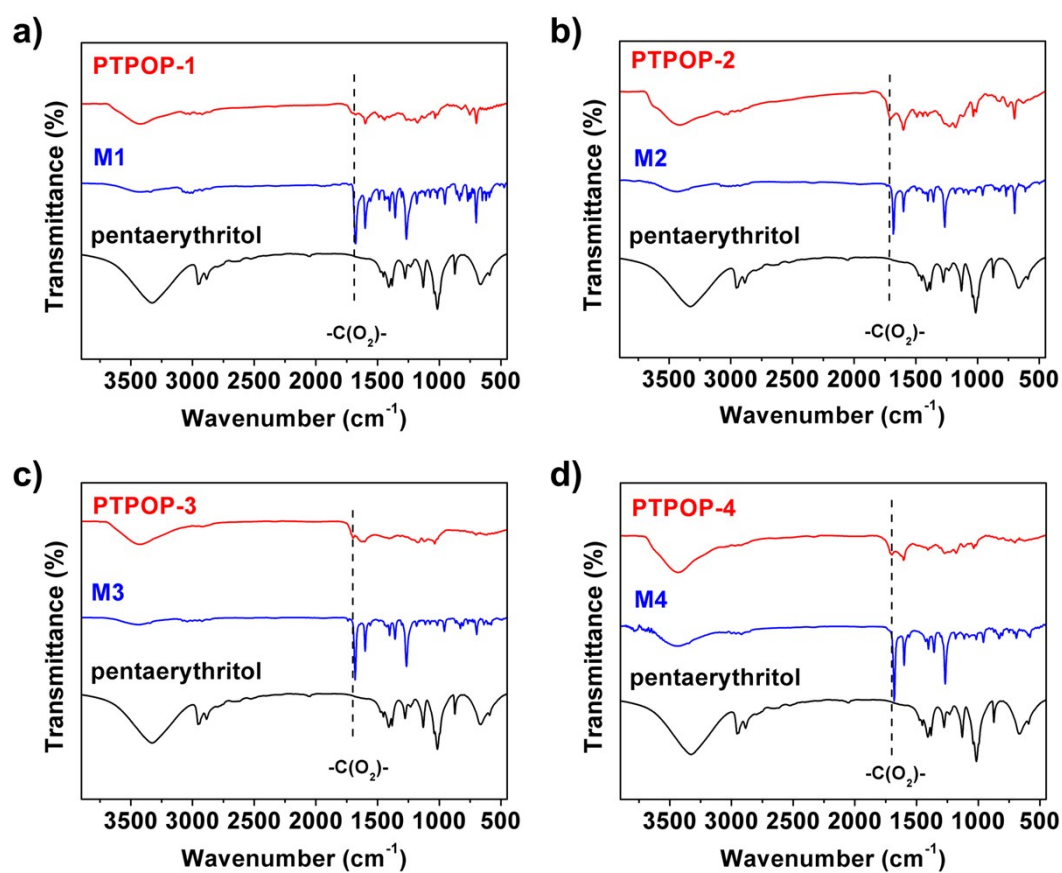

**Fig. S7** FT-IR spectra of **PTPOP-1** (a), **PTPOP-2** (b), **PTPOP-3** (c), and **PTPOP-4** (d)

compared with their monomers.

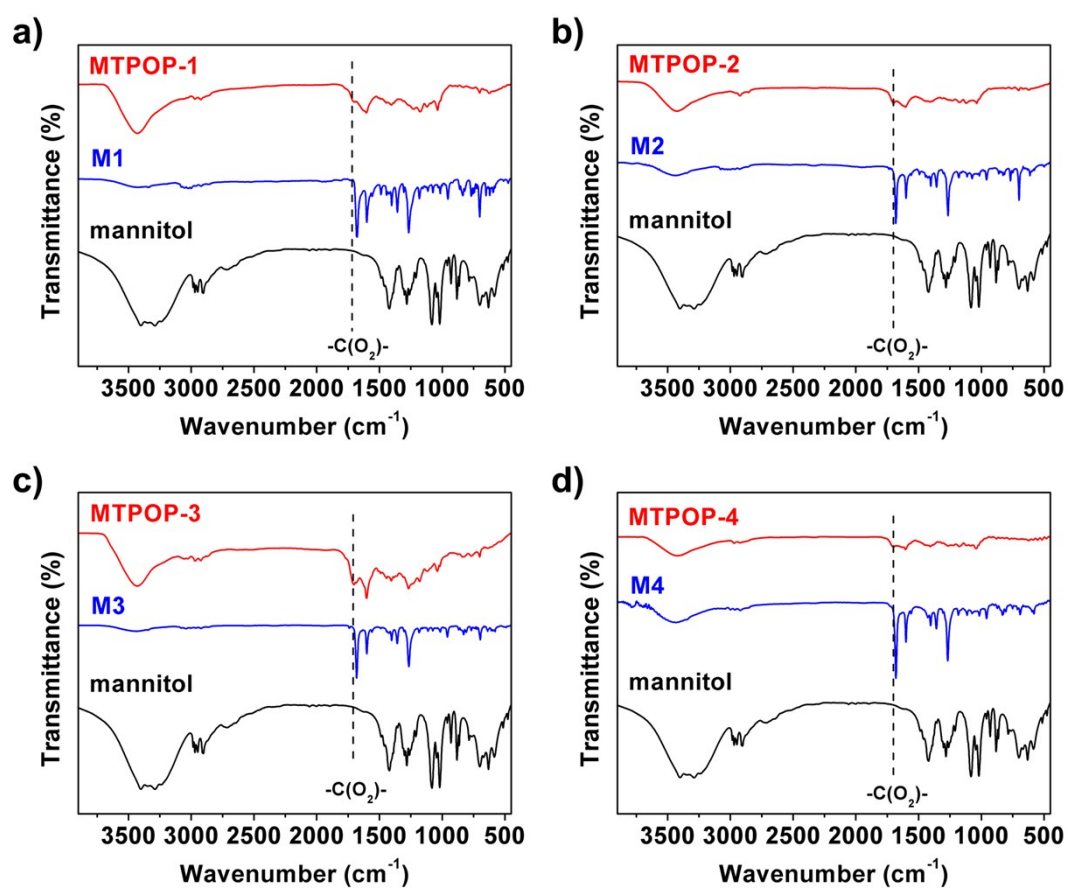

**Fig. S8** FT-IR spectra of **MTPOP-1** (a), **MTPOP-2** (b), **MTPOP-3** (c), and **MTPOP-4** (d) compared with their monomers.

Section F. Solid-state  $^{13}\text{C}$  CP/MAS NMR

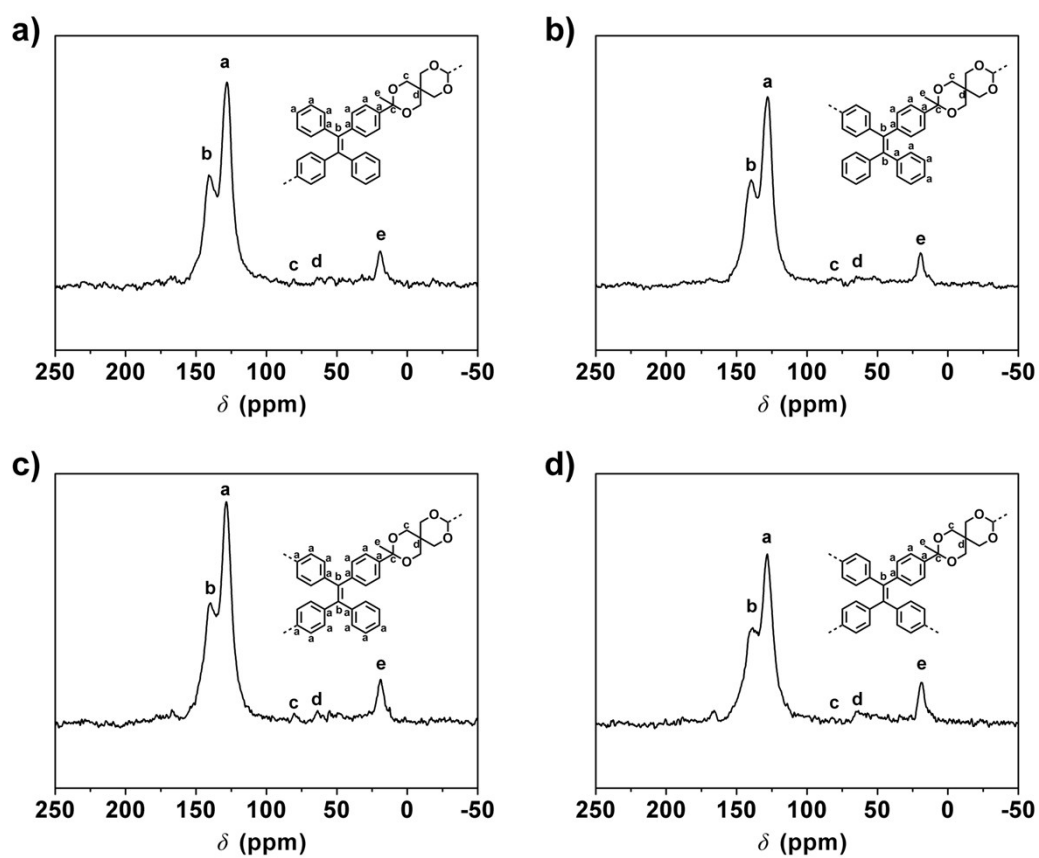

**Fig. S9** Solid-state  $^{13}\text{C}$  CP/MAS NMR spectrum of **PTPOP-1** (a), **PTPOP-2** (b), **PTPOP-3** (c), and **PTPOP-4** (d).

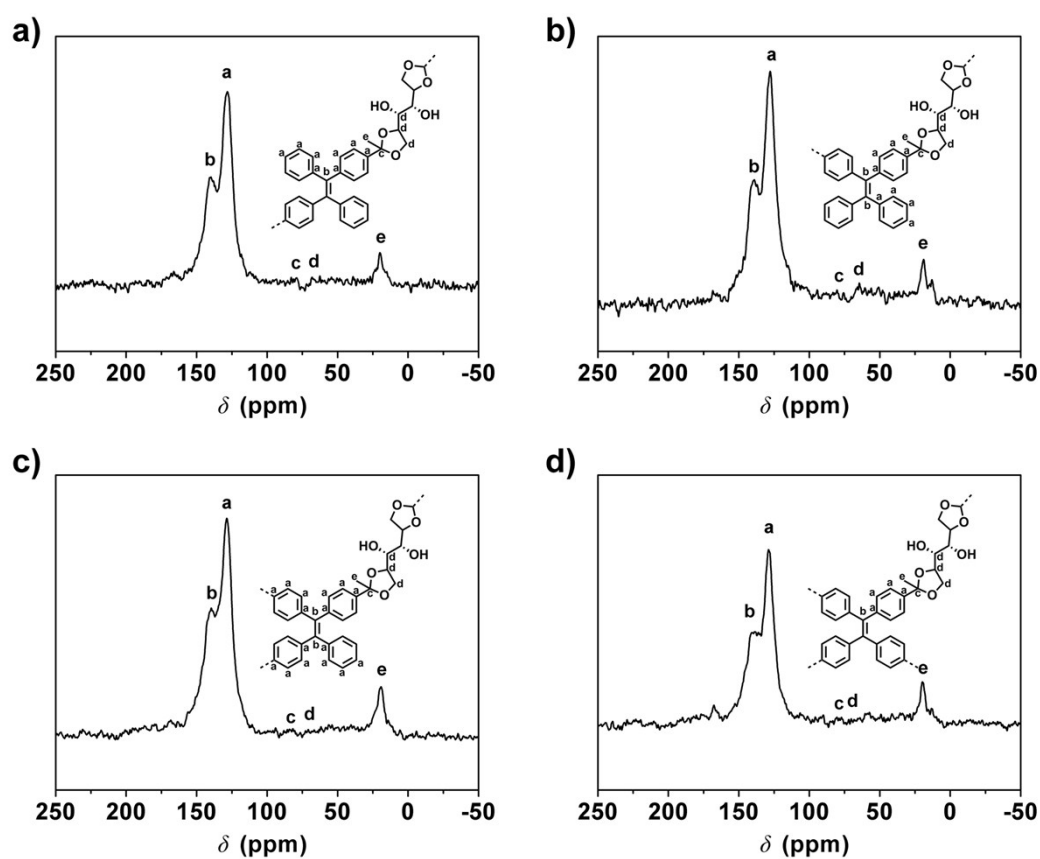

**Fig. S10** Solid-state  $^{13}\text{C}$  CP/MAS NMR spectrum of **MTPOP-1** (a), **MTPOP-2** (b), **MTPOP-3** (c), and **MTPOP-4** (d).

## Section G. Corresponding data of porosity properties

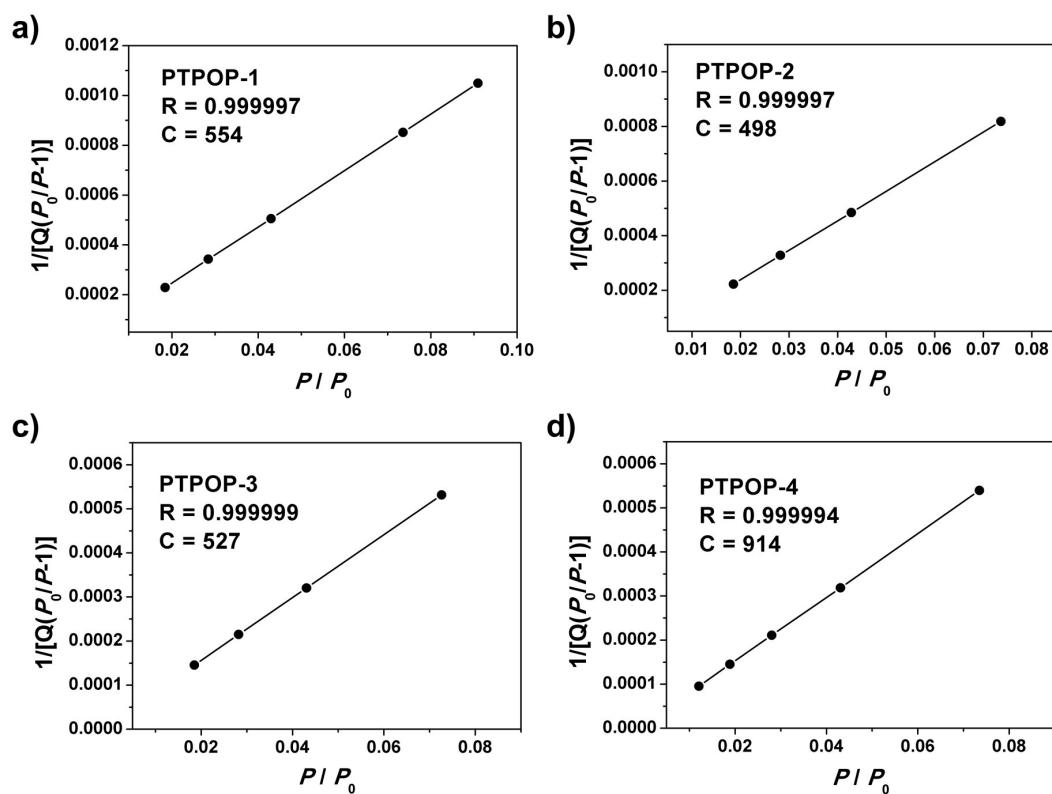

**Fig. S11** BET plots of **PTPOP-1** (a), **PTPOP-2** (b), **PTPOP-3** (c), and **PTPOP-4** (d) from nitrogen adsorption data.

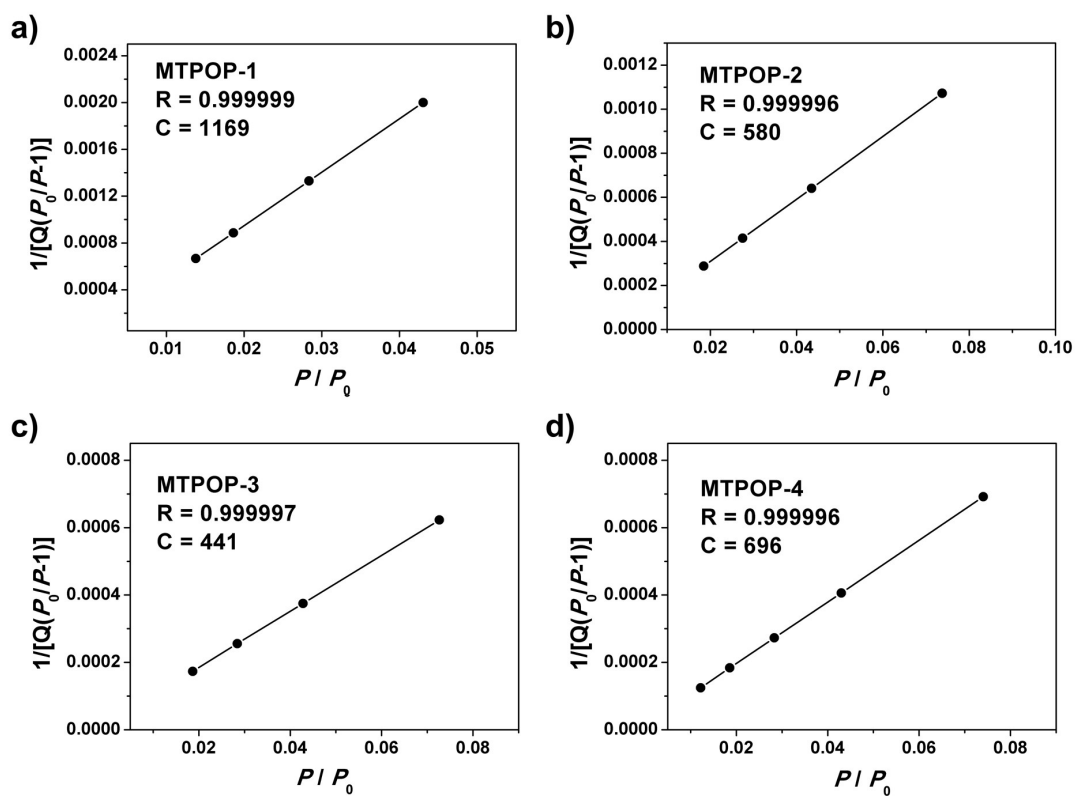

**Fig. S12** BET plots of MTPOP-1 (a), MTPOP-2 (b), MTPOP-3 (c), and MTPOP-4 (d) from nitrogen adsorption data.

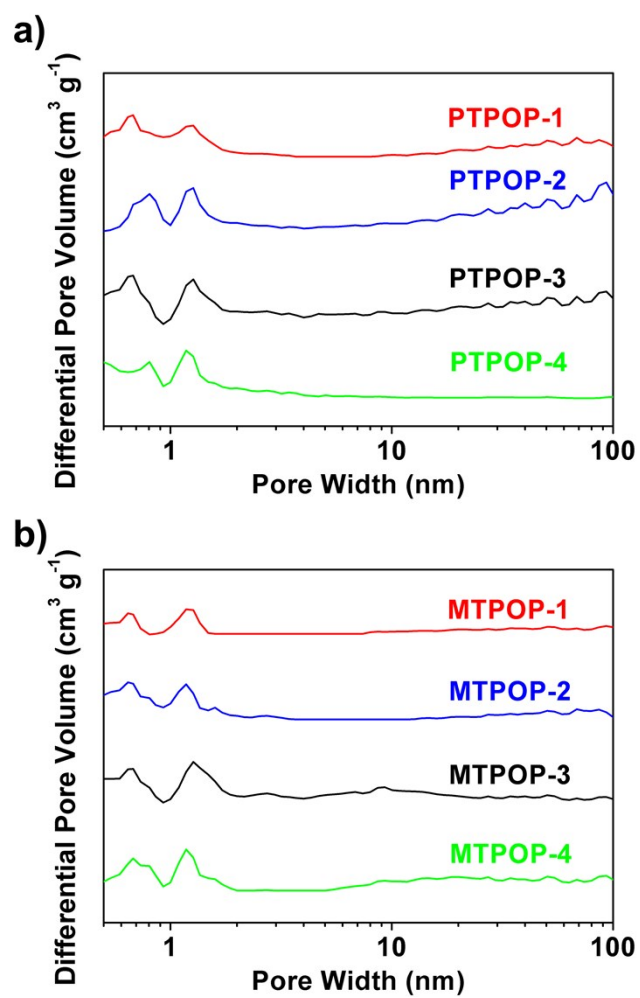

**Fig. S13** Pore size distribution profiles calculated using the NLDFT method of **PTPOP-1–4** (a) and **MTPOP-1–4** (b).

## Section H. Corresponding data of isosteric heats of adsorption

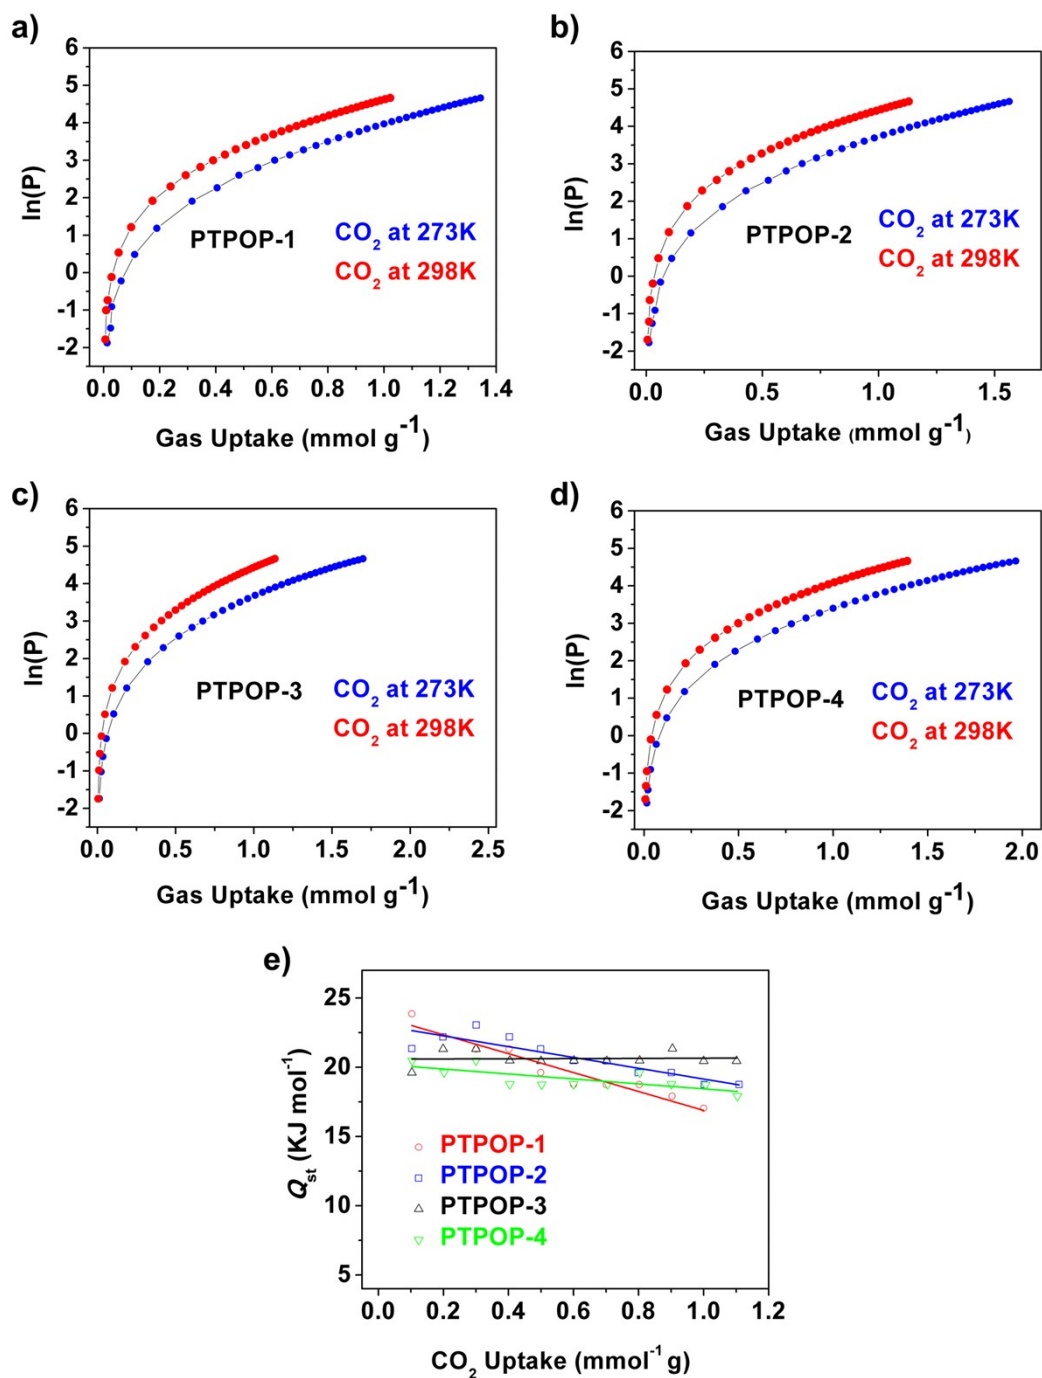

**Fig. S14** Nonlinear curve fitting for **PTPOP-1** (a), **PTPOP-2** (b), **PTPOP-3** (c), and **PTPOP-4** (d) at different temperatures (273 and 298 K). (e) The isosteric heats of adsorption of CO<sub>2</sub> for **PTPOP-1-4**.



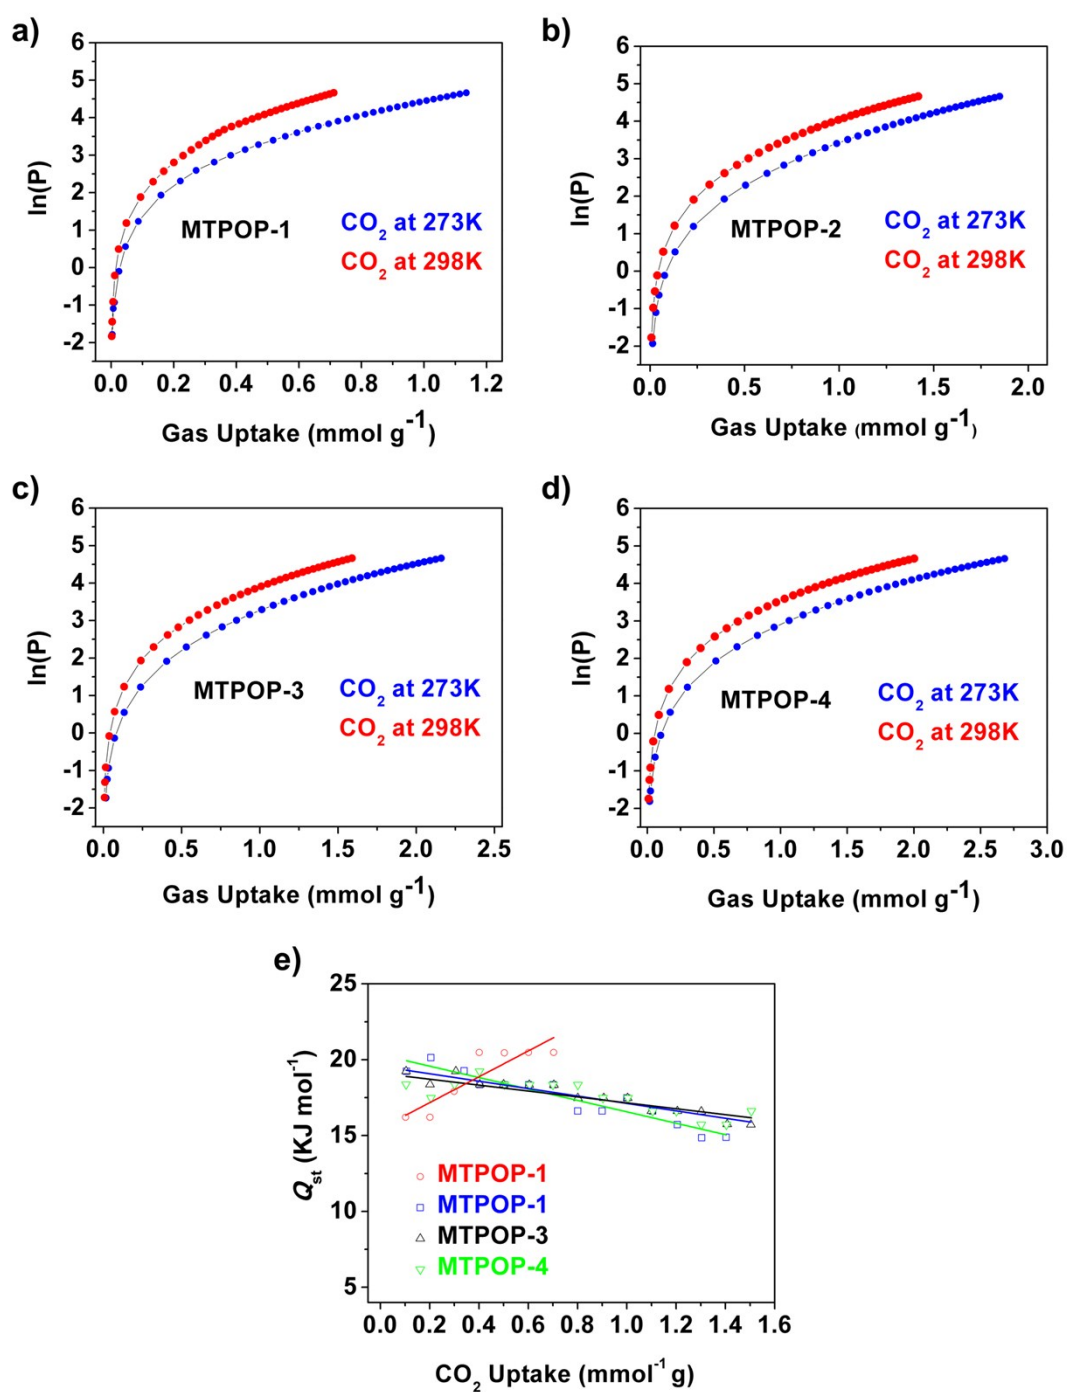

**Fig. S15** Nonlinear curve fitting for **MTPOP-1** (a), **MTPOP-2** (b), **MTPOP-3** (c), and **MTPOP-4** (d) at different temperatures (273 and 298 K). (e) The isosteric heats of adsorption of CO<sub>2</sub> for **MTPOP-1–4**.

## Section I. Corresponding data of gas selectivity analyses

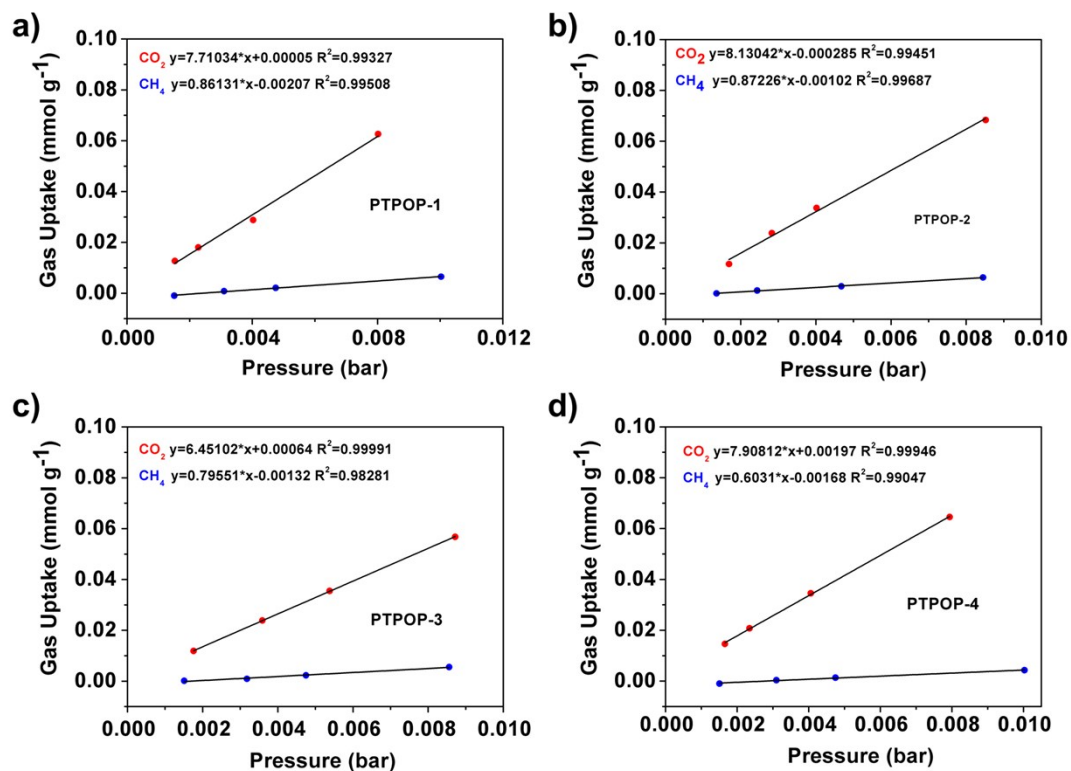

**Fig. S16** CO<sub>2</sub>/CH<sub>4</sub> initial slope selectivity studies for **PTPOP-1** (a), **PTPOP-2** (b), **PTPOP-3** (c), and **PTPOP-4** (d) at 273 K.

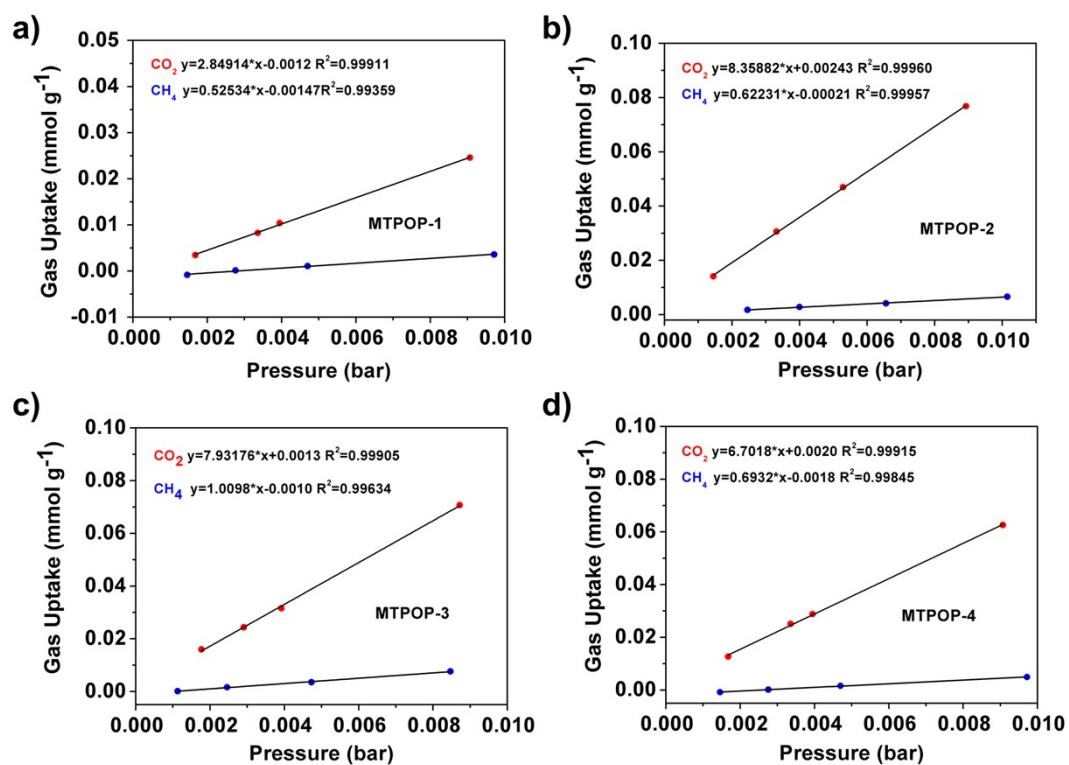

**Fig. S17** CO<sub>2</sub>/CH<sub>4</sub> initial slope selectivity studies for **MTPOP-1** (a), **MTPOP-2** (b), **MTPOP-3** (c), and **MTPOP-4** (d) at 273 K.

**Ideal adsorbed solution theory (IAST) selectivity studies:**

In order to evaluate the efficiency of **PTPOP-1-4** and **MTPOP-1-4** for CO<sub>2</sub> over CH<sub>4</sub> separation, we used the Ideal Adsorbed Solution Theory (IAST) of Myers and Prausnitz along with the pure component isotherm fits to determine the molar loadings in the mixture for specified partial pressures in the bulk gas phase.

The pure component isotherms of CO<sub>2</sub> measured at 273 K were fitted with the dual-site Langmuir (DSL) model:

$$q = q_A + q_B = q_{\text{sat,A}} \frac{b_A p}{1 + b_A p} + q_{\text{sat,B}} \frac{b_B p}{1 + b_B p}$$

The pure component isotherms of CH<sub>4</sub> measured at 273 K were fitted with the single-site Langmuir (SSL) model:

$$q = q_{\text{sat,A}} \frac{b_A p}{1 + b_A p}$$

where,  $q$  is molar loading of adsorbate (mmol g<sup>-1</sup>),  $q_{\text{sat}}$  is saturation loading (mmol g<sup>-1</sup>),  $b$  is parameter in the pure component Langmuir isotherm (bar<sup>-1</sup>),  $p$  is bulk gas phase pressure (bar).

Pure-component isotherm fitting parameters were then used for calculating IAST binary-gas adsorption selectivities ( $S_{\text{ads}}$ ).  $S_{\text{ads}}$  is defined as:

$$S_{\text{ads}} = \frac{q_1/q_2}{p_1/p_2}$$

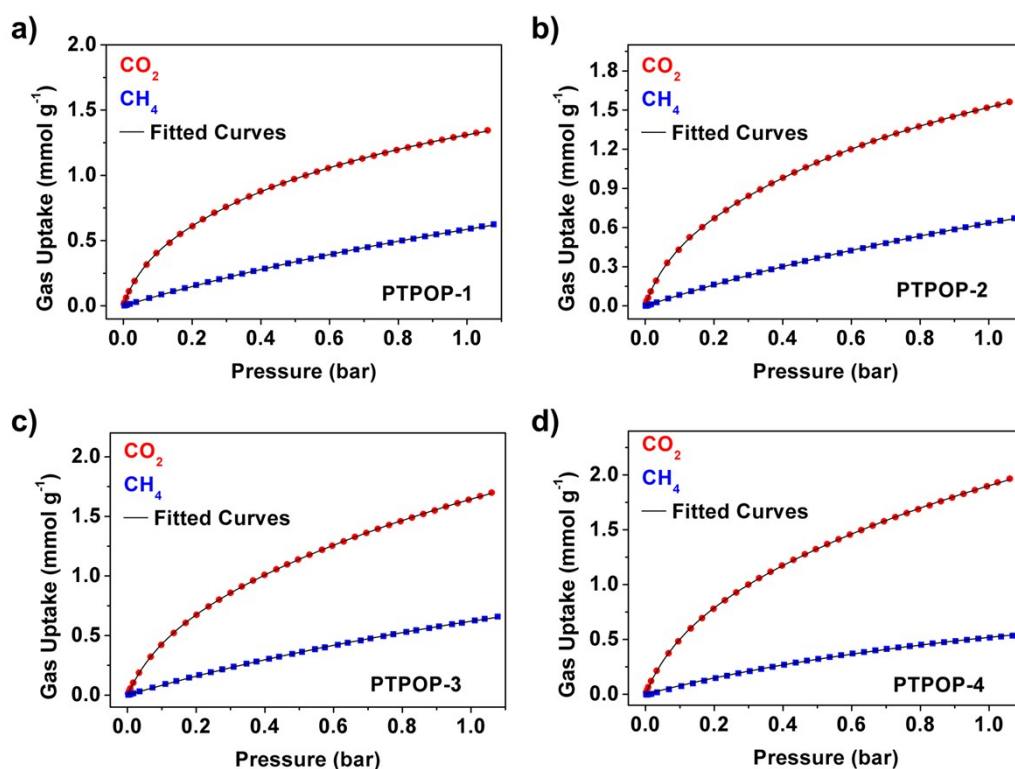

**Fig. S18** The corresponding isotherm fits (solid black lines) dual-site Langmuir model fits for CO<sub>2</sub> and single-site Langmuir model for CH<sub>4</sub> of **PTPOP-1** (a), **PTPOP-2** (b), **PTPOP-3** (c), and **PTPOP-4** (d) based on experimental pure component isotherms for CO<sub>2</sub> (red circle) and CH<sub>4</sub> (blue circle) at 273 K.

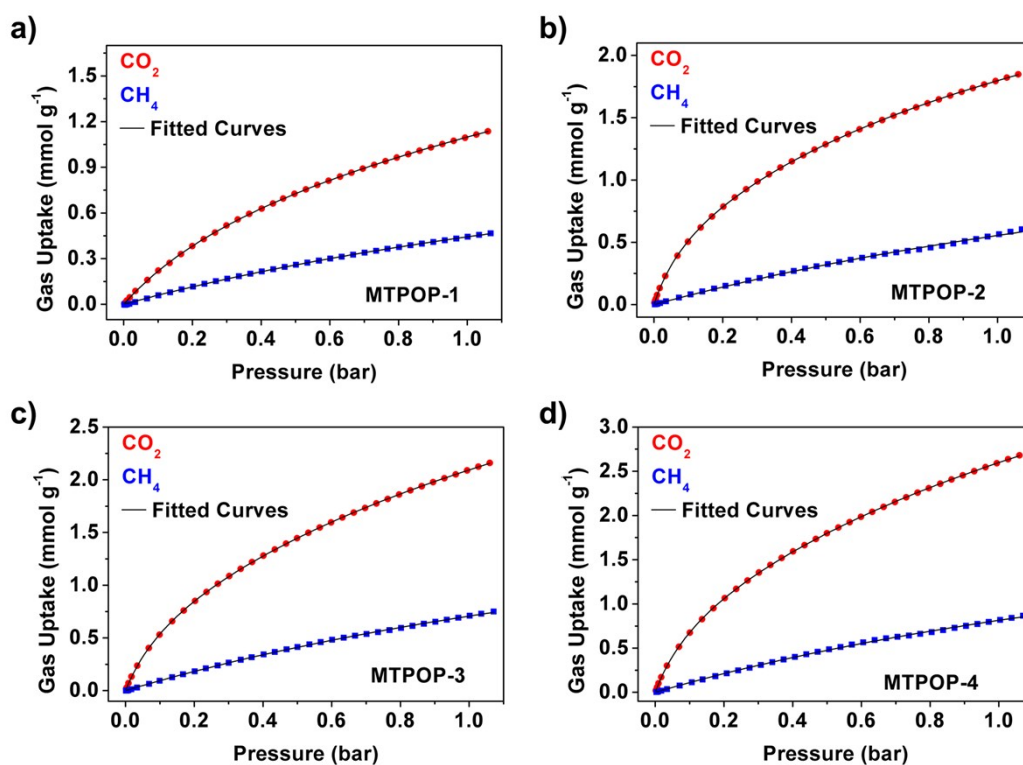

**Fig. S19** The corresponding isotherm fits (solid black lines) dual-site Langmuir model fits for CO<sub>2</sub> and single-site Langmuir model for CH<sub>4</sub> of **MTPOP-1** (a), **MTPOP-2** (b), **MTPOP-3** (c), and **MTPOP-4** (d) based on experimental pure component isotherms for CO<sub>2</sub> (red circle) and CH<sub>4</sub> (blue circle) at 273 K.

**Table S1** Langmuir fitting parameters of CO<sub>2</sub> and CH<sub>4</sub> adsorption isotherms of **PTPOP-1–4** and **MTPOP-1–4** at 273 K.

| Polymers       | Gas             | $q_{\text{sat,A}}$<br>(mmol g <sup>-1</sup> ) | $b_{\text{A}}$<br>(bar <sup>-1</sup> ) | $q_{\text{sat,B}}$<br>(mmol g <sup>-1</sup> ) | $b_{\text{B}}$<br>(bar <sup>-1</sup> ) |
|----------------|-----------------|-----------------------------------------------|----------------------------------------|-----------------------------------------------|----------------------------------------|
| <b>PTPOP-1</b> | CO <sub>2</sub> | 1.902                                         | 0.794                                  | 0.512                                         | 10.788                                 |
|                | CH <sub>4</sub> | 2.246                                         | 0.354                                  |                                               |                                        |
| <b>PTPOP-2</b> | CO <sub>2</sub> | 2.549                                         | 0.706                                  | 0.506                                         | 11.796                                 |
|                | CH <sub>4</sub> | 2.415                                         | 0.356                                  |                                               |                                        |
| <b>PTPOP-3</b> | CO <sub>2</sub> | 3.983                                         | 0.347                                  | 0.703                                         | 7.217                                  |
|                | CH <sub>4</sub> | 2.267                                         | 0.376                                  |                                               |                                        |
| <b>PTPOP-4</b> | CO <sub>2</sub> | 4.366                                         | 0.374                                  | 0.811                                         | 7.402                                  |
|                | CH <sub>4</sub> | 1.399                                         | 0.589                                  |                                               |                                        |
| <b>MTPOP-1</b> | CO <sub>2</sub> | 4.639                                         | 0.113                                  | 0.908                                         | 2.226                                  |
|                | CH <sub>4</sub> | 1.551                                         | 0.400                                  |                                               |                                        |
| <b>MTPOP-2</b> | CO <sub>2</sub> | 3.244                                         | 0.576                                  | 0.674                                         | 9.936                                  |
|                | CH <sub>4</sub> | 2.107                                         | 0.358                                  |                                               |                                        |
| <b>MTPOP-3</b> | CO <sub>2</sub> | 4.704                                         | 0.425                                  | 0.777                                         | 7.996                                  |
|                | CH <sub>4</sub> | 2.528                                         | 0.388                                  |                                               |                                        |
| <b>MTPOP-4</b> | CO <sub>2</sub> | 5.869                                         | 0.417                                  | 0.975                                         | 8.232                                  |
|                | CH <sub>4</sub> | 2.832                                         | 0.403                                  |                                               |                                        |
